# 1 Three points of consideration before testing the effect 2 of patch connectivity on local species richness: patch 3 delineation, scaling and variability of metrics.

4 F. Laroche<sup>1\*</sup>, M. Balbi<sup>1</sup>, T. Grébert<sup>2</sup>, F. Jabot<sup>2</sup> & F. Archaux<sup>1</sup>

5 <sup>1</sup>INRAE, UR EFNO, Domaine des Barres, F-45290 Nogent-sur-Vernisson, France

6 <sup>2</sup>Université Clermont Auvergne, INRAE, UR LISC, F-63178 Aubière, France

7 \*corresponding author: [fabien.laroche@inrae.fr](mailto:fabien.laroche@inrae.fr)

## 8 Abstract

9 The Theory of Island Biogeography (TIB) promoted the idea that species richness within sites  
10 depends on site connectivity, i.e. its connection with surrounding potential sources of  
11 immigrants. TIB has been extended to a wide array of fragmented ecosystems, beyond  
12 archipelagoes, surfing on the analogy between habitat patches and islands and the patch-  
13 matrix framework. However, patch connectivity often little contributes to explaining species  
14 richness in empirical studies. Before interpreting this trend as questioning the broad  
15 applicability of TIB principles, one first needs a clear identification of methods and contexts  
16 where strong effects of patch structural connectivity are likely to occur. Here, we use spatially  
17 explicit simulations of neutral metacommunities to show that patch connectivity effect on local  
18 species richness is maximized under a set of specific conditions: (i) patch delineation should  
19 be fine enough to ensure that no dispersal limitation occurs within patches, (ii) patch  
20 connectivity indices should be scaled according to target organisms' dispersal distance and  
21 (iii) the habitat amount around sampled sites (within a distance adapted to organisms'  
22 dispersal) should be highly variable. When those three criteria are met, the absence of effect  
23 of connectivity on species richness should be interpreted as contradicting TIB predictions.

## 24 Key-words

25 Landscape ecology; Structural connectivity; Virtual ecologist; Neutral landscapes; Dispersal;  
26 Diversity patterns; Habitat amount hypothesis

## 27 Introduction

28 Since the Theory of Island Biogeography (TIB) [1], it is commonly acknowledged that species  
29 presence within local community depends on their ability to immigrate, and that geographic  
30 isolation of communities can negatively affect species richness. Initially devised for insular  
31 ecosystems, TIB principles have been extended to terrestrial ecosystems (see [2,3] for reviews  
32 and critical appraisal). This led to studying how the availability of suitable habitat nearby, called  
33 “patch structural connectivity” [4], can act as a source of immigrants and affect species  
34 richness within local communities. Extending TIB relied on adopting a “patch-matrix”  
35 description of habitat in space, where one decomposes the map of some suitable habitat into  
36 patches that correspond to potential communities (analogous to islands in an archipelago), the  
37 rest of space being considered inhospitable for the species under study.

38 Most of the tests regarding the species diversity patterns predicted by the TIB have focused  
39 on the shape of the species richness – patch area curve, and studied how patches’ connectivity  
40 can modulate this relationship [5]. There is unfortunately no systematic review or meta-analysis  
41 about the species richness – patch connectivity relationship *per se*. Scattered empirical studies  
42 from the literature suggest that connectivity effects on species richness are variable in the field.  
43 The direction and strength of the relationship seems to depend, among other factors, on the  
44 dispersal distance [6,7], the trophic level [8–10] and the degree of generalism [11,12] of  
45 considered species groups, as well as on the perturbation history of sites [13].

46 Clearer syntheses are available when considering the effect of patch connectivity on individual  
47 species presences rather than species richness in itself. A meta-analysis of 1’015 empirical  
48 studies within terrestrial systems, Prugh et al. [14] evidenced that patch structural connectivity,  
49 measured as distance to the nearest patch, tends to have weak predictive power on species  
50 presence within patches (median deviance explained equaled about 20%). Another review of  
51 122 empirical studies [15], which covered terrestrial and aquatic systems and analyzed the  
52 presence or abundance of 954 species, evidenced that the effects of local environmental  
53 conditions within a patch on species presence or abundance occurred more frequently (71%  
54 of species analyses) than the effects of patch structural connectivity (55% of species analyses).

55 Former studies thus tend to suggest that patch structural connectivity seems to be a non-robust  
56 and relatively weak predictor of species richness, which potentially questions the role of  
57 immigration as an important process in community assembly within fragmented habitats.  
58 According to Prugh et al. [14], the limited success of patch connectivity indices may come from  
59 several conceptual flaws of applying the TIB framework to non-archipelago landscapes: (i)  
60 inadequately using structural connectivity indices based on surrounding habitat rather than

61 functional connectivity indices based on surrounding populations (i.e. habitat being actually  
62 occupied by target species); (ii) inadequately delineating patches for species harboring  
63 multiple life stages with contrasted requirements (e.g., juveniles living in aquatic habitats and  
64 adults living in terrestrial habitats); (iii) overlooking the type of matrix surrounding the habitat  
65 patch, hence questioning the validity of the patch-matrix framework for terrestrial systems. In  
66 the same vein, Cook et al. [16] also suggested that an important fraction of species found in  
67 patches could also survive and even thrive in the matrix, hence explaining the failure of TIB  
68 applications to non-archipelago landscapes.

69 However, the limited success of patch structural connectivity indices may also stem from  
70 several methodological limits. Thornton et al. [15] mentioned for instance the problem of using  
71 inadequate patch structural connectivity metrics, emphasizing that buffer indices are generally  
72 more performant than widely used isolation metrics (a point that was also raised by several  
73 other studies [17,18]). Second, inadequate scaling of indices with respect to target organisms  
74 dispersal distance may also drive down the explanatory power of patch connectivity indices  
75 upon species presence/absence, community diversity and presumably species richness. The  
76 higher the dispersal distance of species, the larger the scaling of indices should be to reach  
77 the best possible explanatory power, as demonstrated by several simulation studies [19,20].  
78 Third, patches are often built through lumping together sets of contiguous habitat pixels on a  
79 land cover map, following a “vector map” perspective [21]. However, this approach brings no  
80 guarantee that the resulting spatial entities have the appropriate size to constitute potential  
81 communities for target organisms, and considering entities with inadequate spatial resolution  
82 with respect to target processes is known to erode expected patterns [22]. Fourth, empirical  
83 studies about connectivity effects may have suffered from a lack statistical power [15],  
84 especially when structural connectivity little fluctuates among patches.

85 Interpreting the limited predictive power of patch structural connectivity as an explanatory  
86 failure of the TIB framework is valid only when methods used and landscape context should  
87 theoretically foster large effect sizes. Therefore, before questioning the first principles of the  
88 TIB framework, one first needs identifying which methods for measuring patch structural  
89 connectivity and which properties of the habitat spatial distribution of studied systems should  
90 yield strong effects of patch structural connectivity on local species richness.

91 In our analysis, we focused on how the patch delineation, the type of patch connectivity index,  
92 the scaling of indices with species dispersal distance, and the variability of indices within  
93 landscapes affect the explanatory power of patch structural connectivity on local species  
94 richness. We aimed at deriving good practices with respect to these four points. In particular,  
95 we made three predictions. First, we expected the predictive power of connectivity indices to

96 be optimal when patch delineation matches the geographical scale of studied communities, in  
97 such a way that there is no within-patch dispersal limitation. Second, we expected that the  
98 scaling of patch connectivity indices maximizing the explanatory power would positively  
99 correlate with species dispersal distance, as suggested by previous findings. Third and last,  
100 we expected a higher variability of connectivity indices among patches to yield a stronger patch  
101 connectivity effects on local species richness.

102 We used a virtual ecologist approach [23] relying on metacommunity simulations in a spatially-  
103 explicit model to test these predictions. Virtual datasets stemming from such models constitute  
104 an ideal context to assess the impact of our factors of interest, since they offer perfect control  
105 of the spatial distribution of habitat and the ecological features of species. In particular, we only  
106 included processes related to the TIB (immigration, ecological drift; [24]), thus maximizing our  
107 ability to study how methodological choices and landscape features affect the explanatory  
108 power of patch structural connectivity. We anticipated that explanatory powers generated by  
109 this approach would necessarily be an over-estimation of what occurs in real ecosystems,  
110 where many processes unrelated to TIB may also be at work. This implies in particular that  
111 settings negatively affecting the explanatory power of patch structural connectivity in our  
112 simulation study have very little chance to yield strong explanatory power in empirical studies,  
113 and cannot be used to criticize the predictions of TIB.

## 114 Materials and methods

115 *Landscape generation* - We considered binary landscapes made of suitable habitat cells and  
116 inhospitable matrix cells. We generated virtual landscapes composed of 100×100 cells using  
117 a midpoint-displacement algorithm [25] which allowed us covering different levels of habitat  
118 quantity and fragmentation. The proportion of habitat cells varied according to three modalities  
119 (10%, 20% of 40% of the landscapes). The spatial aggregation of habitat cells varied  
120 independently, and was controlled by the Hurst exponent (0.1, 0.5, and 0.9 in increasing order  
121 of aggregation; see Fig. S1 for examples). Ten replicates for each of these nine landscape  
122 types were generated, resulting in 90 landscapes. Higher values of the Hurst exponent for a  
123 given value of habitat proportion increased the size of sets of contiguous cells and decreased  
124 the number of distinct sets of contiguous cells (Fig. S2). Higher habitat proportion for a constant  
125 Hurst exponent value also resulted in higher mean size of sets of contiguous cells.

126 *Neutral metacommunity simulations* - We simulated spatially explicit neutral metacommunities  
127 on virtual heterogeneous landscapes. We resorted to using a spatially explicit neutral model  
128 of metacommunities, where all species have the same dispersal distance. We used a discrete-  
129 time model where the metacommunity changes by steps. All habitat cells were occupied, and

130 community dynamics in each habitat cell followed a zero-sum game, so that habitat cells  
131 always harbored 100 individuals at the beginning of a step. One step was made of two  
132 consecutive events. Event 1: 10% of individuals die in each cell – they are picked at random.  
133 Event 2: dead individuals are replaced by the same number of recruited individuals that are  
134 randomly drawn from a multinomial distribution, each species having a weight equal to  $0.01 \times \chi_i$   
135  $+ \sum_k A_{ik} \exp(-d_{kf} / \lambda_s)$  where  $\chi_i$  is the relative abundance of species  $i$  in the regional pool,  $A_{ik}$  is  
136 the local abundance of species  $i$  in habitat cell  $k$ ,  $d_{kf}$  is the distance (in cell unit) between the  
137 focal habitat cell  $f$  and the source habitat cell  $k$ ,  $\lambda_s$  is a parameter defining species dispersal  
138 distances and the sum is over all habitat cells  $k$  of the landscape.

139 The regional pool was an infinite pool of migrants representing biodiversity at larger spatial  
140 scales than the focal landscape, it contained 100 species, the relative abundances of which  
141 ( $\chi_i$ s) were sampled once for all at the beginning of the simulation in a Dirichlet distribution with  
142 concentration parameters  $\alpha_i$  equal to 1 (with  $i$  from 1 to 100).

143 Distances between habitat pixels ( $d_{kf}$ ) were defined as the Euclidean distance on a torus, to  
144 remove unwanted border effects in metacommunity dynamics. Metacommunities were  
145 simulated with three levels of species dispersal distance:  $\lambda_s = 0.25, 0.5, 1$  cell, which  
146 corresponded to median dispersal distance of 0.6, 0.7, 0.9 cell and average dispersal distance  
147 of 0.6, 0.8, 1.2 cells. The 95% quantile of dispersal distance corresponded to 1.2, 1.7, 3.1 cells  
148 respectively.

149 For a given landscape replicate, metacommunity replicates were obtained by recording the  
150 state of a metacommunity at various dates in one forward in time simulation, with 1000 burn-  
151 in steps and 500 steps between each replicate. The recorded state of the metacommunity  
152 included the abundances of each species in each habitat cell. We performed 10 replicates for  
153 each dispersal distance value and in each simulated landscape. In total, we obtained 2,700  
154 metacommunity replicates (3 Hurst exponent values  $\times$  3 habitat proportions  $\times$  3 species  
155 dispersal distances  $\times$  10 landscape replicates  $\times$  10 metacommunity replicates).

156 *Patch connectivity indices* – For each habitat cell of the 90 simulated landscapes, we computed  
157 three types of patch connectivity indices (Table 1; Fig. 1A): *Buffer*, *dF* and *dIICflux*. *Buffer*  
158 indices corresponded to the proportion of area covered by habitat within circles of different  
159 radius ( $r_{buf} = 1, 2, 4, 5, 8$  cells) around the focal cell.

160

161 **Table 1 — Patch connectivity indices considered in the study**

| Index           | Definition                                                                                                     | Ref.    |
|-----------------|----------------------------------------------------------------------------------------------------------------|---------|
| <i>Buffer</i>   | $\text{buf}_k = \frac{a}{\pi r^2} \sum_{\substack{i=1 \\ i \neq k}}^n 1_{d_{ik} \leq r}$                       | [17]    |
| <i>dIICflux</i> | $dIICflux_k = \frac{100}{IIC} \left[ 2 \sum_{\substack{i=1 \\ i \neq k}}^n \frac{a_k a_i}{1 + n_{ij}} \right]$ | [28]    |
| <i>dF</i>       | $dF_k = 2 \sum_{\substack{i=1 \\ i \neq k}}^n w_{ik}$                                                          | [21,26] |

162 **Notations:**  $n$ : total number of nodes (patches or cells) in a graph;  $a$ : area of a cell;  $a_i$ : area of patch  $i$ ;  $r$ : radius of *Buffer*;  $n_{ij}$ :  
 163 shortest path between nodes  $i$  and  $j$  in a binary graph;  $IIC = \sum_{i=1}^n \sum_{j=1}^n a_i a_j / (1 + n_{ij})$ : integral index of connectivity of a graph;  $d_{ij}$ :  
 164 Euclidean distance between nodes  $i$  and  $j$ ;  $w_{ij}$ : probability weight of the link between nodes  $i$  and  $j$  in a weighted graph.

165 The computation of *dIICflux* and *dF* relied on delineating habitat “patches”. We alternatively  
 166 considered two delineation approaches (Fig. S3): patches were defined either as single habitat  
 167 cells in the landscape (“fine” patch delineation) or as groups of contiguous habitat cells  
 168 (“coarse” patch delineation). With fine patch delineation, each patch corresponded to a single  
 169 community. With coarse patch delineation, patches contained as many communities as cells  
 170 forming the patches. For each approach, pairs of patches obtained were then connected by  
 171 links. Links’ weights  $w_{ij}$  between nodes  $i$  and  $j$  in the network decreased according to the  
 172 formula  $\exp(-d_{ij}/\lambda_c)$ , where  $d_{ij}$  is the Euclidean distances between nodes  $i$  and  $j$  and  $\lambda_c$  is a scale  
 173 parameter [21,26].  $\lambda_c$  may be interpreted as the hypothesized scale of dispersal distance of  
 174 target organisms in the landscape (which may differ from the “true” simulated scale of dispersal  
 175 distance, which is  $\lambda_s$ ). We considered four scale parameter values ( $\lambda_c = 0.25, 0.5, 1$  and  $2$   
 176 cells). *dF* quantified the sum of edges weights between the focal patch and all the other  
 177 patches. *dIICflux* considered a binary graph, where each node pair was considered either  
 178 connected (1) or not (0) relatively to a minimal link weight  $w_{\min} = 0.005$ . Scale parameters  $\lambda_c =$   
 179  $0.25, 0.5, 1$  and  $2$  cells thus lead to connect all pairs of habitat cells separated by a distance  
 180 inferior to 1.3, 2.6, 5.3 and 10.6 cells respectively. *dIICflux* captured a notion of node centrality,  
 181 like *dF*, but based on topological distance in the graph rather than Euclidean distance. All  
 182 indices were computed with Conefor 2.7 (command line version for Linux, furnished by S.  
 183 Saura, soon publicly available on [www.conefor.org](http://www.conefor.org); [27]).

184 Altogether, in each habitat cell of each simulated landscape, we computed 5 *Buffer* indices +  
 185 8 *dF* indices + 8 *dIICflux* indices = 21 patch connectivity indices per sampled cell.

186 **Sampling design** - For each simulated landscape, we defined a set of sampled cells, including  
 187 habitat cells away from each other’s for a minimal distance of 12 cells, to reduce spatial auto-  
 188 correlation (e.g. Fig. 1A). We also reduced potential landscape border effect by excluding cells

189 near landscape borders (to a distance inferior or equal to eight cells, equivalent to the longest  
190 radius used for *Buffer* index, see below). Each landscape counted in average 25 sampled cells  
191 (CI-95% = [23, 27]).

192 **Figure 1 – Example of analysis of the explanatory power of *Buffer* index in a virtual**  
193 **dataset.** Panel A: a virtual landscape obtained through midpoint displacement algorithm, with  
194 controlled habitat proportion (here 0.4) and Hurst exponent (here 0.1). Brown cells stands for  
195 unhabitable matrix. Green cells denote habitat cells. Lighter cells harbor a higher patch  
196 connectivity *Buffer* index (here computed with radius 8 cells). Blue circles show sampled cells.  
197 Panel B: relationship between *Buffer* index and species richness in sampled cells for a  
198 metacommunity replicate within the landscape of panel A. The relationship was analyzed using  
199 a quadratic model (red curve), and the  $R^2$  of the model,  $R^2_{spec}$ , was recorded for future  
200 analyses. The species dispersal distance used to simulate the metacommunity replicate  
201 presented here was  $\lambda_s = 1$  cell.

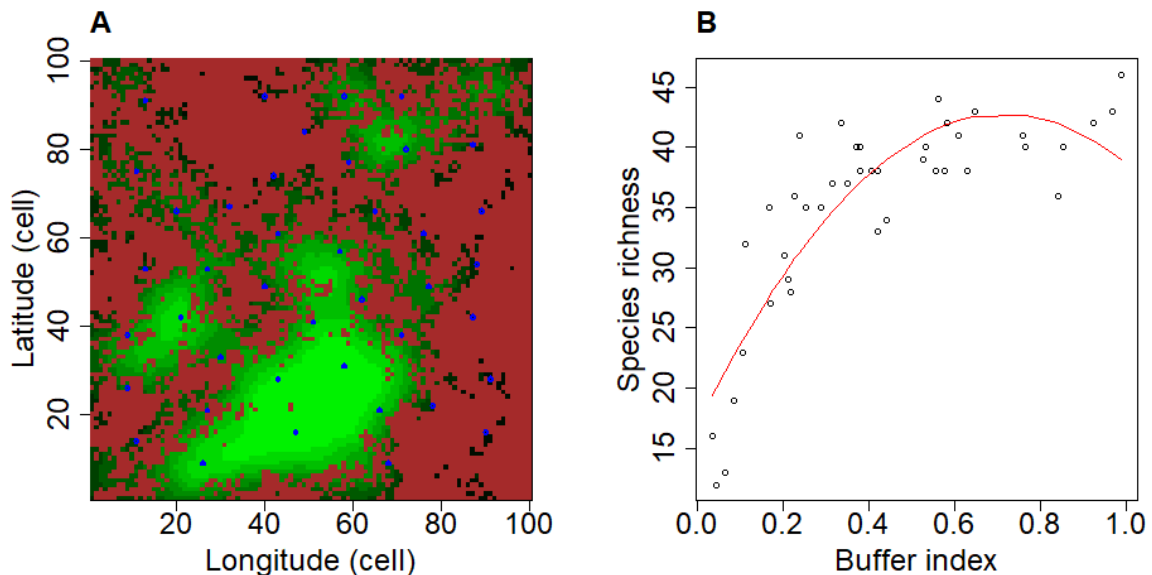

202

203 General approach – For each of the 2700 metacommunity recorded states, we computed  
204 species richness within habitat cells belonging to the sampling design. We thus obtained  $21 \times$   
205  $2700 = 56,700$  relationships between a connectivity index and species richness. For each  
206 relationship, we computed the maximum proportion of species richness variance explained by  
207 a quadratic function of the connectivity index (e.g. Fig. 1B). We called “explanatory power” of  
208 the connectivity index this proportion below, and we computed it by recording the  $R^2$  coefficient  
209 of the linear model  $Species\ richness \sim Patch\ connectivity + (Patch\ connectivity)^2$ . We denoted  
210 these  $R^2$  coefficients as “ $R^2_{spec}$ ”. We applied linear models on this set of  $R^2_{spec}$  values to test  
211 our three predictions, as detailed below.

212 Testing prediction 1: patch delineation effect – Our first prediction was that the explanatory  
213 power of connectivity indices should be optimal when patch delineation matches the  
214 geographical scale of studied communities, hence ensuring no within-patch dispersal

215 limitation. In our simulations, the size of habitat cells within a land cover map matches the  
216 community size of species, therefore we predicted that lumping contiguous habitat cells  
217 together into larger patches would deteriorate the explanatory power of indices with respect to  
218 species richness. We tested this prediction by exploring the effect of patch delineation on  $R2_{spec}$   
219 for  $dF$  and  $dIICflux$  indices. *Buffer* indices were not considered in this analysis because they  
220 did not depend on patch delineation.

221 In each of the 2,700 simulated dataset, we recorded  $R2_{spec}$  for  $dF$  or  $dIICflux$  computed with a  
222 fine patch delineation. Both  $dF$  and  $dIICflux$  had four possible scaling values, potentially  
223 yielding four distinct  $R2_{spec}$  values per index for the same virtual dataset. Here, we aimed at  
224 controlling for the variation of  $R2_{spec}$  due to index scaling (which are analyzed separately in the  
225 next section). To do so, we focused on the highest value out of the four distinct  $R2_{spec}$  values  
226 in the present analysis. We thus obtained 2,700 datasets  $\times$  2 indices = 5,400  $R2_{spec}$  values.

227 Then we considered patch connectivity indices computed with a coarse patch delineation. In  
228 each of the 2,700 simulated dataset, we fitted a linear model with species richness as a  
229 dependent variable. We used the connectivity index ( $dF$  or  $dIICflux$ ) and the area of the patch  
230 containing the sampled cell as independent variables. We included patch area in the analysis  
231 to ensure fair comparison with the fine patch delineation analysis. Here again, we included  
232 quadratic terms ( $dF^2$  or  $dIICflux^2$ , and  $area^2$ ). We recorded  $R2_{spec}$  of the models and kept only  
233 the highest values across possible scaling parameters, which yielded again 2,700  $\times$  2 = 5,400  
234  $R2_{spec}$  values.

235 We then analyzed the 10,800  $R2_{spec}$  values generated above with one linear model per index  
236 type ( $dF$  or  $dIICflux$ ), where the dependent variable  $R2_{spec}$  was modelled as a function of the  
237 patch delineation (“coarse” or “fine”) in interaction with landscape Hurst exponent, habitat  
238 proportion and species dispersal distance (all these independent variables being considered  
239 as factors). We expected  $R2_{spec}$  to be significantly higher at fine patch delineation, which we  
240 tested using the model  $R2_{spec} \sim patch\ delineation$ . We also expected the positive effect of  
241 switching from coarse to fine patch delineation to increase when Hurst exponent (i.e. habitat  
242 aggregation) or habitat proportion increase, because patches (sets of contiguous cells here)  
243 become larger on average, leading to stronger dispersal limitation effects within patches. We  
244 tested this second hypothesis using two models with interactions:  $R2_{spec} \sim patch\ delineation \times$   
245  $Hurst\ exponent$  and  $R2_{spec} \sim patch\ delineation \times habitat\ proportion$ . At last, we expected the  
246 positive effect of switching from coarse to fine patch delineation to decrease when species  
247 dispersal distance increases, because dispersal limitation within patches weakens. We tested  
248 this last hypothesis using the model:  $R2_{spec} \sim patch\ delineation \times dispersal$ .



249 Testing prediction 2: index scaling effect – Our second prediction was that the scaling of patch  
250 connectivity indices maximizing the explanatory power upon species richness should increase  
251 with dispersal distance of target organisms. We tested it by recording, in the 2,700 simulated  
252 datasets,  $R2_{spec}$  for *Buffer*, *dIICflux* and *dF* patch connectivity indices computed with a fine  
253 patch delineation at each scaling parameter value. We thus obtained 2,700 datasets  $\times$  3  
254 indices  $\times$  4 or 5 scaling parameter values [4 for *dF* and *dIICflux*, 5 for *Buffer*] = 35,100  $R2_{spec}$   
255 values. We then built one linear model per index type (*Buffer*, *dF* or *dIICflux*), where  $R2_{spec}$  was  
256 the dependent variable, modelled as a function of species dispersal distance in interaction with  
257 index scale parameter  $R2_{spec} \sim dispersal \times scaling\ value$ . For each species dispersal distance,  
258 we could then identify the scaling of indices maximizing  $R2_{spec}$ , which we call the “optimal”  
259 scaling. We expected the optimal scaling of indices to increase with the dispersal distance of  
260 species, following previously published results in the literature [19,20].

261 Testing prediction 3: connectivity variability effect – Our third and last prediction was that a  
262 higher variability of patch connectivity indices among sampled sites should increase the  
263 explanatory power of connectivity metrics upon species. We tested it by recording, in the 2,700  
264 simulated datasets, the maximal value of  $R2_{spec}$  across scaling parameter value for *Buffer*,  
265 *dIICflux* and *dF* patch connectivity indices computed with a fine patch delineation. This  
266 generated 2,700 virtual datasets  $\times$  3 index types = 8100  $R2_{spec}$  values. Then we explored  
267 separately for each index at each species dispersal distance how the coefficient of variation of  
268 patch connectivity indices affected  $R2_{spec}$ . For each index, we computed the average value of  
269  $R2_{spec}$  with optimal scaling across the 10 metacommunity replicates associated to one  
270 landscape and one dispersal distance level ( $avR2_{spec}$  below). We computed the corresponding  
271 average coefficient of variation of the patch connectivity index with optimal scaling ( $avCV$ ).  
272 Thus, we obtained 3 Hurst exponent  $\times$  3 habitat proportion  $\times$  3 dispersal distance  $\times$  10  
273 landscape replicates = 270 pairs of  $avCV$  and  $avR2_{spec}$  values. We analyzed the relationship  
274 between these quantities using the linear model  $logit(avR2_{spec}) \sim log(avCV)$ . We expected  
275 landscapes with higher  $avCV$  to yield higher  $avR2_{spec}$ .

276 We additionally tested whether the effects of habitat aggregation and habitat proportion on  
277  $R2_{spec}$  were completely mediated by the coefficient of variation of the connectivity index. To do  
278 so, we added the interaction of habitat aggregation and habitat proportion in the above-  
279 mentioned linear model (i.e. considering  $logit(avR2_{spec}) \sim log(avCV) + Hurst\ exponent \times habitat$   
280 *proportion*). A significant improvement of the model fit would have suggested that habitat  
281 aggregation and habitat proportion modulated the explanatory power of connectivity indices  
282 beyond their effect on its coefficient of variation among sampled sites.

283 Codes for landscape generation and metacommunity simulation, virtual datasets combining  
284 simulation outputs and patch connectivity indices and codes of the analyses of virtual datasets  
285 presented above have been made available on an online repository (doi:  
286 10.5281/zenodo.3756712).

## 287 Results

288 The median of the 56,700  $R2_{spec}$  values obtained from our simulations was 0.65, suggesting  
289 that the explanatory power of patch connectivity indices was generally strong. However, the  
290 explanatory power fluctuated a lot around the median value: 2.5% of  $R2_{spec}$  values were below  
291 0.07 while another 2.5% were above 0.94.

292 Prediction 1: patch delineation effect – For both  $dF$  and  $dIIcflux$ , using a fine patch delineation  
293 yielded higher  $R2_{spec}$  than using a coarse patch delineation ( $dF$ : +0.19 on average, s.e.=0.005,  
294  $p<2e-16$ ;  $dIIcflux$ : +0.08 on average, s.e.=0.006,  $p<2e-16$ ).

295 For  $dF$  index, high Hurst exponent (high habitat aggregation) significantly increased the  
296 positive effect of refining patch delineation on  $R2_{spec}$  compared to medium or low Hurst  
297 exponent ( $F$ -test;  $F=3.8$ ,  $p=0.02$ ). However, this modulation had a limited effect size: for high  
298 Hurst exponent,  $R2_{spec}$  increased by +0.21 (s.e.=0.009) with fine delineation, while it increased  
299 by +0.18 (s.e.=0.009) for medium or low Hurst exponent. A larger proportion of habitat in the  
300 landscape significantly increased the positive effect of refining patch delineation on  $R2_{spec}$  ( $F$ -  
301 test;  $F=16.6$ ,  $p=6e-8$ ): the effect of refining patch delineation on  $R2_{spec}$  reached +0.23  
302 (s.e.=0.009) for a habitat proportion of 0.4 while it equaled +0.16 (s.e.=0.009) only for a habitat  
303 proportion of 0.1 (Fig. 2A). Higher species dispersal distance decreased the positive effect of  
304 refining patch delineation on  $R2_{spec}$  ( $F$ -test;  $F=192$ ,  $p<2e-16$ ): the effect of refining patch  
305 delineation on  $R2_{spec}$  reached +0.28 (s.e.=0.008) when species had low dispersal distance  
306 while it equaled +0.07 (s.e.=0.008) when species had high dispersal distance (Fig. 2B).

307 For  $dIIcflux$  index, a higher Hurst exponent increased the positive effect of refining patch  
308 delineation on  $R2_{spec}$  ( $F$ -test;  $F=11.5$ ,  $p=9e-6$ ): the effect of refining patch delineation equaled  
309 +0.12 (s.e.=0.01) in highly aggregated landscapes with a Hurst exponent of 0.9. By contrast,  
310 the effect of refining patch delineation equaled +0.07 only (s.e.=0.01) in landscapes with a  
311 Hurst exponent of 0.1 (Fig. 2C) and +0.06 (s.e.=0.01) in landscapes with an intermediary Hurst  
312 exponent of 0.5. Habitat proportion and species dispersal distance did not significantly affect  
313 the effect of refining patch delineation on  $R2_{spec}$ .

314 **Figure 2 — Hurst exponent, habitat proportion and species dispersal distance**  
315 **modulating the effect of refining patch delineation on the explanatory power of patch**  
316 **connectivity indices.** Bars show the average  $R2_{spec}$  over simulated datasets for distinct levels  
317 of habitat proportion (panel A), species dispersal distance (panel B) and Hurst exponent (panel  
318 C), with asymptotic 95% confidence intervals (half width = 1.96 x standard error). Panel A and  
319 B come from the analysis of the  $dF$  index while Panel C comes from the analysis of  $dIICflux$ ,  
320 hence the different color.

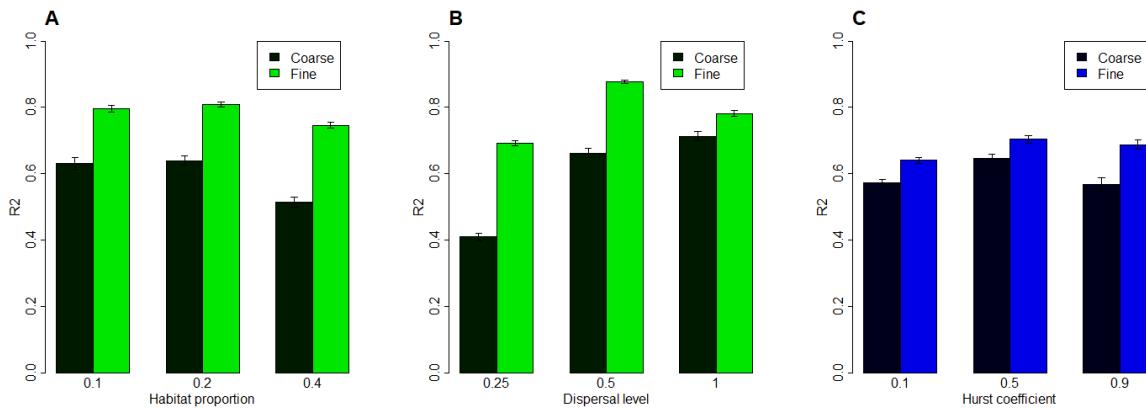

321

322 Prediction 2: index scaling effect –For *Buffer*,  $dF$  and  $dIICflux$ , the scaling parameter value  
323 yielding the highest  $R2_{spec}$  increased with species dispersal distance (Fig. 3). Because of our  
324 high number of simulations, the mean  $R2_{spec}$  obtained with optimal scaling was always  
325 significantly higher than mean values obtained with other scaling values. However, mean  
326  $R2_{spec}$  rarely departed from the optimal scaling performance by more than one standard  
327 deviation, and it only happened for scaling parameter values very different from the optimal  
328 scaling (Fig. 3). Therefore, the magnitude of the variation of mean  $R2_{spec}$  between scaling  
329 parameter value could be considered as small compared to the intrinsic variability of  $R2_{spec}$  for  
330 a given scaling parameter value.

331 The range of scaling parameters explored was not sufficient to obtain precise quantitative  
332 relationships between species dispersal distance and index scaling. For *Buffer* and  $dF$  indices,  
333 the optimal value sometimes lied at the higher boarder of the explored range for medium or  
334 high species dispersal distance, suggesting that the true optimal scaling value may actually be  
335 higher than the explored range. For  $dIICflux$  index, the optimal scaling value lied at the lower  
336 border of the explored range for low and medium species dispersal distances, suggesting that  
337 the true optimal scaling may actually be lower than the explored range. However, these results  
338 were sufficient to reveal that the relationship between species dispersal distance and optimal  
339 scaling is variable among the three types of index tested. In particular, the optimal scaling of  
340 *Buffer* radius ( $r_{buf}$ ) corresponded to about 8 times the true scale of species dispersal distance  
341 ( $\lambda_s$ ; Fig. 3A). The optimal scaling of  $dF$  indices ( $\lambda_c$ ) seemed to lie between 2 and 4 times the  
342 true scale of species dispersal distance (Fig. 3B), while the optimal scaling parameter of

343 *dIICflux* indices ( $\lambda_c$ ) seemed to be about 0.5 times the true scale of species dispersal distance  
 344 (Fig. 3C).

345 **Figure 3 — Combined effects of species dispersal distance and scaling parameter of**  
 346 **patch connectivity indices on indices explanatory power.** Panels A, B and C correspond  
 347 to *Buffer*, *dF* and *dIICflux* indices respectively. Colors indicate the average explanatory power  
 348 ( $R^2_{spec}$ ) of the considered connectivity index across all the simulations with given species  
 349 dispersal distance ( $\lambda_s$ ; x-axis) and scaling parameter ( $r_{buf}$  in panel A  $\lambda_c$  in panels B and C; y-  
 350 axis). For each species dispersal distance, we marked with a black dot the “optimal” scaling  
 351 parameter value, i.e. the scaling parameter value yielding the highest  $R^2_{spec}$  among the  
 352 explored values. We connected these dots to show, for each type of connectivity index, the  
 353 species dispersal distance – scaling parameter relationship maximizing  $R^2_{spec}$  in our  
 354 simulations (beware that scales of axes are not linear). Because of our high number of  
 355 simulations, the mean  $R^2_{spec}$  obtained with optimal scaling is always significantly higher than  
 356 mean  $R^2_{spec}$  obtained with other scaling values. However, the difference between mean  $R^2_{spec}$   
 357 for different scaling values was often small: for each species dispersal distance, we marked  
 358 with circles the scaling parameter values that yield  $R^2_{spec}$  values such that mean plus one  
 359 standard deviation is higher than the mean  $R^2_{spec}$  obtained with optimal scaling.

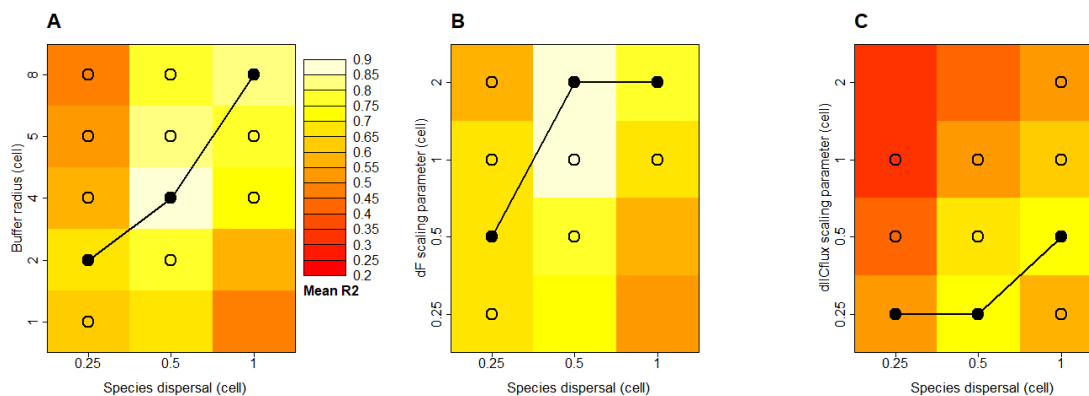

360

361 Global performance of indices — When considering only connectivity indices with optimal  
 362 scaling at fine patch delineation, a 95% of the 8,100 corresponding  $R^2_{spec}$  values lied between  
 363 0.35 (2.5% percentile) and 0.96 (97.5% percentile), with median value of 0.79. *Buffer* and *dF*  
 364 stood out as the most performant index on average. The average  $R^2_{spec}$  of *Buffer* was  
 365  $R^2_{spec}=0.79$  (s.e.=0.003). Average  $R^2_{spec}$  for *dF* differed from *Buffer* by -0.01, which was not  
 366 significant. By contrast, the average  $R^2_{spec}$  for *dIICflux* index significantly differed from *Buffer*  
 367 by -0.11 (*t*-test;  $t=-27$ ,  $p<2e-16$ ).

368 Prediction 3: connectivity variability effect — The linear model  $\text{logit}(avR^2_{spec})\sim\text{log}(avCV)$   
 369 always detected a significant positive relationship between the coefficient variation and the  
 370 explanatory power of connectivity indices (Fig. 4), with  $p < 2e-16$  for *Buffer*, and  $p = 2e-9$  and  
 371  $4e-4$  for *dF* and *dIICflux* respectively. The effect size of the coefficient of variation was markedly  
 372 stronger for *Buffer* (estimate of 2.1 in the linear model with 0.17 s.d.) than for *dF* (estimate of  
 373 0.6 with 0.10 s.d.) and *dIICflux* (estimate of 0.3 with 0.09 s.d.). The  $R^2$  of the linear model

374  $\text{logit}(avR2_{spec}) \sim \text{log}(avCV)$  was stronger for *Buffer* (0.34) than for *dF* (0.13) and *dIICflux* (0.04),  
375 suggesting that the explanatory power of *Buffer* index is more tightly linked to its coefficient of  
376 variation than the two other indices. In line with this finding, adding the interaction of habitat  
377 aggregation and habitat proportion in the linear model (i.e. considering  
378  $\text{logit}(avR2_{spec}) \sim \text{log}(avCV) + \text{Hurst exponent} \times \text{habitat proportion}$ ) did not significantly improve  
379 the fit for *Buffer* index ( $p=0.2$  on a *F*-test),. By contrast, it did for the two other indices ( $p=2e-2$   
380 and  $p=4e-7$  on a *F*-test for *dF* and *dIICflux* respectively). Note that, reciprocally, adding the  
381 coefficient of variation *avCV* always significantly improved the fit compared to a model with  
382 *Hurst exponent*  $\times$  *habitat proportion* only ( $p < 2e-16$ ,  $p = 2e-10$  and  $p = 5e-8$  on a *F*-test for *Buffer*,  
383 *dF* and *dIICflux* respectively).

384 **Figure 4 - Explanatory power of patch connectivity indices ( $R2_{spec}$ ) as a function of the**  
385 **coefficient of variation of patch connectivity index.** Panels A, B and C correspond to *Buffer*,  
386 *dF* and *dIICflux* index respectively. Symbols corresponds to species dispersal distance. The  
387 y-coordinate presents the average value of  $R2_{spec}$  with optimal scaling across the 10  
388 community replicates associated to one landscape and one dispersal distance level. The x-  
389 coordinate presents the corresponding average coefficient of variation (CV) of the patch  
390 connectivity index with optimal scaling. Thus there are 3 Hurst exponents  $\times$  3 habitat  
391 proportions  $\times$  3 dispersal distances  $\times$  10 landscape replicates = 270 dots in each panel. The  
392 red curve present the fit of the linear model  $\text{logit}(R2_{spec}) \sim \text{log}(CV)$  over these dots. The light-  
393 red envelope present a 95%-confidence interval around the fit.

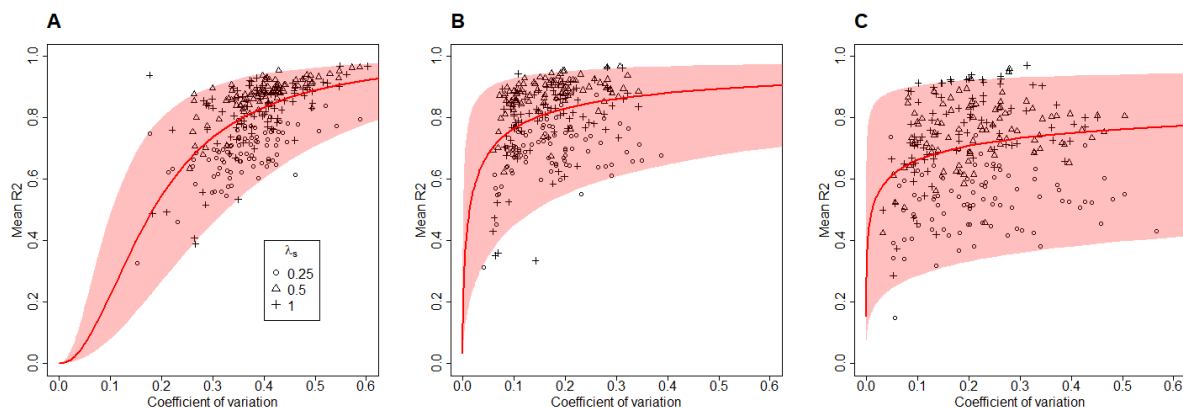

394

## 395 Discussion

396 Our study aimed at clarifying how patch delineation procedure, scaling of connectivity indices  
397 and connectivity variability among habitat patches could affect the explanatory power of three  
398 patch connectivity indices on species richness within patch. Our goal was to identify methods  
399 and landscape contexts that would foster strong patch connectivity – species richness  
400 relationships and thus provides relevant tests of the TIB framework. We expected that a virtual  
401 study would offer favorable settings to monitor the effect of patch connectivity on patch species  
402 richness in that they only modelled dispersal processes (combined with demographic  
403 stochasticity), and would therefore maximize our ability to study how methodological choices  
404 and landscape features affect the explanatory power of patch structural connectivity. This

405 expectation was verified in our results: the explanatory power of connectivity indices was  
406 generally high but showed marked contrast among simulations, hence allowing us to identify  
407 clear patterns when testing our three main predictions.

408 Prediction 1: patch delineation effect – We expected the predictive power of connectivity  
409 indices to be optimal when patch delineation matches the geographical scale of studied  
410 communities, hence ensuring no within-patch dispersal limitation. To test this prediction, we  
411 compared the explanatory power of connectivity indices ( $R^2_{spec}$ ) when considering each  
412 elementary cell as a patch (the appropriate delineation with respect to simulations) versus  
413 when considering sets of contiguous cells as patches.  $R^2_{spec}$  values were higher at fine patch  
414 delineation, where no dispersal limitation occurred within patches. The coarser patch  
415 delineation considering sets of contiguous habitat as patches led to important drop of  $R^2_{spec}$   
416 values, reaching about -0.2 when species harbored strong dispersal limitation (Fig. 2B). Our  
417 prediction was therefore corroborated.

418 In the light of our results, we suggest that even when target habitats form “intuitive” patches  
419 (e.g. forest patches in agricultural landscapes), one should define *a priori* a grid with  
420 appropriate mesh size and use it to decompose the habitat map in elementary units, used for  
421 both community sampling and computation of connectivity indices. In particular, we discourage  
422 comparing community sampling and patch connectivity obtained at different spatial resolutions,  
423 which is often the case in empirical studies where species richness is derived from sampling  
424 covering only a small fraction of large patches obtained from coarse delineation (e.g.  
425 vegetation quadrats, birds point counts or insect traps). Our results suggest that using mesh  
426 size equal to the scale of dispersal distance for target organisms should allow strong patch  
427 connectivity - species richness relationships.

428 Whether using smaller mesh size should erode species richness – connectivity relationship  
429 remains an open question. It is however obvious that very fine patch delineation can make  
430 connectivity indices computation challenging, since it can increase by several orders of  
431 magnitude the number of spatial units. This particularly affect indices stemming from graph  
432 theory that need to determine shortest paths between all pairs of spatial units. Here we have  
433 been able to compute  $dII Cflux$  in all the virtual landscapes at fine patch delineation (up to 4000  
434 habitat units in a single landscape). Consequently, indices based on binary networks seem to  
435 pass the test of computational time. By contrast, we were unable to compute analogous indices  
436 in weighted networks (e.g.,  $dPCflux$ ; [30]).

437 Determining *a priori* the appropriate mesh size corresponding to the scale of dispersal distance  
438 for the group of species under study is not straightforward, especially since in real communities  
439 – contrary to our simulations – movement capacity and dispersal distance are heterogeneous

440 among species. Beyond the binary comparison between coarse and fine patch delineation that  
441 we proposed here, one should now explore the sensitivity of patch connectivity indices  
442 explanatory power to varying mesh size (as suggested by Mazerolle and Villard [29] in real  
443 empirical studies). This would allow assessing whether some degree of uncertainty on that  
444 parameter is acceptable.

445 *Prediction 2: index scaling effect* – Our second prediction was that the scaling of patch  
446 connectivity indices maximizing the explanatory power upon species richness should increase  
447 with dispersal distance of target organisms. We found that the scaling of patch connectivity  
448 indices leading to maximal explanatory power on species richness (the “scale of effect” *sensu*  
449 Jackson and Fahrig [19]) increased with the dispersal distance of target organism, in line with  
450 our prediction, and previous findings obtained from virtual studies [19,20]. This is a strong  
451 argument to prefer patch connectivity indices with a scaling parameter that can be modulated  
452 to match the dispersal distance of organisms rather than indices that cannot be adapted like  
453 distance to nearest patch. It also confirms that the scale of effect should capture some  
454 quantitative features of species dispersal distance, as it is often contended in the empirical  
455 literature (e.g., [31,32]).

456 However, the scale of effect should not be used as a quantitative estimate of dispersal distance  
457 for two reasons. First, we observed that scaling parameter values around the optimal one often  
458 generated a small drop of explanatory power, suggesting that the explanatory power was not  
459 highly sensitive to errors on scaling parameter value. Therefore, finding the scaling parameter  
460 that maximizes the correlation is probably not an accurate method to obtain estimate of species  
461 dispersal distance. This is consistent with the fact that, in empirical systems, buffer radii  
462 maximizing the explanatory power over species presence or abundance can spread over a  
463 large array of distances without significant drop of explanatory power, sometimes covering  
464 several orders of magnitude (e.g., [33]). Second, the quantitative relationship between the  
465 scale of effect and species dispersal distance was variable among indices tested. Rather, the  
466 relationship between the scale of effect and the scale of species dispersal distance may be  
467 used to roughly rank species or groups of species according to their dispersal distance. It can  
468 also contribute, when some *a priori* information is available about the dispersal distance of  
469 target organisms, to defining the range of scaling parameter values in which the scale of effect  
470 should be searched for.

471 Here we considered neutral metacommunities where all the species have the same dispersal  
472 distance. This greatly simplified the analysis of the relationship between the scale of effect of  
473 indices and species dispersal distances. However, species dispersal distances in real  
474 communities are known to be heterogeneous [34,35]. One may therefore question how our

475 findings can transfer to real empirical studies. The fact that, for a given species dispersal  
476 distance and a given index, a broad range of scaling parameters have an explanatory power  
477 similar to the scale of effect could here turn out to be an advantage: a scaling parameter value  
478 adapted to the average dispersal distance of species in the community might be fairly adapted  
479 to all the species in the community. Of course, this should not be valid anymore if species  
480 dispersal distances are highly heterogeneous among species.

481 *Global performance of indices* – Our study allowed us to compare the explanatory power of the  
482 three type of connectivity indices considered here. *Buffer* and *dF* indices lead to high and very  
483 similar performance when used with appropriate scaling. This stemmed from the fact that these  
484 two indices are highly correlated (average correlation across landscapes above 0.95; Fig. S4).  
485 In our study, *Buffer* resembled *dF* index when its radius was about 4 times the *dF* scaling  
486 parameter value. [17] had already evidenced that correlations between IFM index (a  
487 generalization of the *dF* index; [38]) and buffers could reach 0.9 in a real landscape (their study  
488 did not focus on how the scaling of both indices could affect the correlation). *Buffer* and *dF*  
489 indices are both weighted sums of surrounding habitat cells contribution, where weights  
490 decreases with Euclidean distance following some kernel function. The only difference  
491 between the two indices is that *Buffer* is based on a step function while *dF* is based on a  
492 smoothly decreasing exponential kernel. We therefore interpret our results as the fact that  
493 changing the decreasing function used as a kernel may little affect the local connectivity as  
494 long as scaling is adjusted. This may explain why Miguet et al. [39] found that: (i) switching  
495 from buffer to continuously decreasing kernel little affected AIC or pseudo- $R^2$  of models used  
496 to predict species abundances; (ii) neither continuously decreasing nor step function was  
497 uniformly better to explain species abundance across four case studies; (iii) different  
498 continuous shapes of kernel had quite indiscernible predictive performance.

499 The *dIICflux* index had a lower explanatory power than *Buffer* and *dF* indices on average (-  
500 0.12 on  $R_{spec}$ ). This difference in global performance was made possible by the fact that  
501 *dIICflux* harbored a different profile than *dF* and *Buffer* in landscapes (Fig. S4), because it  
502 considers topological rather than Euclidean distance to compute connectivity. The use of five  
503 scaling values only in our analysis calls for some caution in the interpretation of the *dIICflux*  
504 lower explanatory power. The optimal scaling value of *dIICflux* for low and intermediate  
505 dispersal distances seemed to lie below the lower limit of the range explored in our study.  
506 Consequently, the explanatory power of this index might be underestimated compared to the  
507 other ones and partly explain why it seems less efficient in predicting species richness.

508 Part of the relative success of *dF* and *Buffer* over *dIICflux* may also stem from the fact that we  
509 did not include different resistance values to habitat and matrix cells. When heterogeneous



510 resistance occurs, landscape connectivity including displacement costs (e.g. least cost path,  
511 circuit theory) can be markedly different from prediction based on Euclidean distance only [40],  
512 and may better capture the movement of organisms in real case study [41,42]. This probably  
513 also applies to patch connectivity. By connecting only cells that contain habitat, *dIICflux* and  
514 other indices based on topological distance within a graph could prove more performant when  
515 matrix has high resistance cost, and we may not find the same superiority of Euclidean indices  
516 as in our simulations.

517 *Prediction 3: connectivity variability effect* – Our third and last prediction was that a higher  
518 variability of patch connectivity indices among sampled sites should increase the explanatory  
519 power of connectivity metrics upon species. We found a consistent positive relationship  
520 between the coefficient of variation of the patch connectivity indices and explanatory power,  
521 hence corroborating our expectation. The coefficient of variation of *Buffer* was sufficient to  
522 explain the fluctuation of explanatory power among landscapes with distinct habitat proportion  
523 or aggregation. Hence, the coefficient of variation of *Buffer* index with optimal scaling provides  
524 a remarkably simple and practical tool to assess whether a landscape has potential to reveal  
525 an effect of connectivity on species richness. Importantly, the relationship between the  
526 coefficient of variation and the explanatory power was looser for the two other index types  
527 explored (*dF* and *dIICflux*), and habitat aggregation and proportion seemed to affect the  
528 explanatory power beyond their effect on those indices' variability. Thus, *Buffer* stands out as  
529 the appropriate index to assess connectivity variability in the context of our study. Whether this  
530 specificity holds when (i) broader range of scaling parameter values are explored for  
531 topological indices like *dIICflux* or (ii) landscapes harbor heterogeneous resistance is an open  
532 question that calls for more virtual studies. From an empirical perspective, our results  
533 emphasized the pivotal role of *Buffer* coefficient of variation and now call for defining  
534 appropriate thresholds on this coefficient to observe an effect on species richness. This  
535 requires meta-analyses of formerly published studies, accounting for taxa and habitat  
536 specificities.

## 537 Conclusion

538 Our results suggest that finding a strong effect of some patch structural connectivity on local  
539 species richness can occur only if: (i) spatial units used as patches are sufficiently small to  
540 prevent internal dispersal limitation within patches, which can be obtained by using a raster  
541 perspective with appropriate mesh size for patch delineation; (ii) the scaling of the patch  
542 connectivity index is adapted to the dispersal distance of species considered, which can be  
543 obtained by screening scaling parameters over a range of values defined from a priori

544 knowledge about species dispersal distance; (iii) a *Buffer* index with optimal scaling harbors a  
545 high variability among sampled patches. When those three criteria are met, the absence of  
546 effect of connectivity on species richness should be interpreted as contradicting TIB  
547 predictions. *Buffer* indices particularly stood out in our analysis, as they efficiently summarized  
548 landscape effects on species richness and show higher explanatory power than other index  
549 types. When used with appropriate scaling, they seem a robust choice to recommend for  
550 empirical applications. However, new virtual studies including heterogeneous resistance within  
551 landscapes are necessary to ascertain this point.

## 552 Acknowledgments

553 We thank Santiago Saura for sharing CONEFOR code. This work was part of the Patrames  
554 project funded by the convention 2016 n°2101870336 of the French Ministry of Environment  
555 (Water and Biodiversity Direction).

## 556 Conflict of interest disclosure

557 The authors of this preprint declare that they have no financial conflict of interest with the  
558 content of this article. FL and FJ belong to the panel of PCI Ecology recommenders.

## 559 References

- 560 1. MacArthur RH, Wilson EO. 1967 *The theory of island biogeography*. Princeton University Press.  
561 Princeton, NJ.
- 562 2. Itescu Y. 2019 Are island-like systems biologically similar to islands? A review of the evidence.  
563 *Ecography* **42**, 1298–1314. (doi:10.1111/ecog.03951)
- 564 3. Haila Y. 2002 A conceptual genealogy of fragmentation research: from island biogeography to  
565 landscape ecology. *Ecological Applications* **12**, 321–334. (doi:10.1890/1051-  
566 0761(2002)012[0321:ACGOFR]2.0.CO;2)
- 567 4. Tischendorf L, Fahrig L. 2001 On the use of connectivity measures in spatial ecology. A reply.  
568 *Oikos* **95**, 152–155. (doi:10.1034/j.1600-0706.2001.950117.x)
- 569 5. Schoener TW. 2010 The MacArthur-Wilson Equilibrium Model. In *The theory of island*  
570 *biogeography revisited*, pp. 52–87. Princeton, New Jersey: Princeton University Press.
- 571 6. Jones NT, Germain RM, Grainger TN, Hall AM, Baldwin L, Gilbert B. 2015 Dispersal mode  
572 mediates the effect of patch size and patch connectivity on metacommunity diversity. *Journal of*  
573 *Ecology* **103**, 935–944. (doi:10.1111/1365-2745.12405)

- 574 7. Löbel S, Snäll T, Rydin H. 2009 Mating system, reproduction mode and diaspore size affect  
575 metacommunity diversity. *Journal of Ecology* **97**, 176–185. (doi:10.1111/j.1365-  
576 2745.2008.01459.x)
- 577 8. Mestre L, Jansson N, Ranius T. 2018 Saproxylic biodiversity and decomposition rate decrease  
578 with small-scale isolation of tree hollows. *Biological Conservation* **227**, 226–232.  
579 (doi:10.1016/j.biocon.2018.09.023)
- 580 9. Buse J, Entling MH, Ranius T, Assmann T. 2016 Response of saproxylic beetles to small-scale  
581 habitat connectivity depends on trophic levels. *Landscape Ecology* **31**, 939–949.  
582 (doi:10.1007/s10980-015-0309-y)
- 583 10. Schüepp C, Herrmann JD, Herzog F, Schmidt-Entling MH. 2011 Differential effects of habitat  
584 isolation and landscape composition on wasps, bees, and their enemies. *Oecologia* **165**, 713–  
585 721. (doi:10.1007/s00442-010-1746-6)
- 586 11. Sverdrup-Thygeson A, Skarpaas O, Blumentrath S, Birkemoe T, Evju M. 2017 Habitat connectivity  
587 affects specialist species richness more than generalists in veteran trees. *Forest Ecology and*  
588 *Management* **403**, 96–102. (doi:10.1016/j.foreco.2017.08.003)
- 589 12. Ranius T, Martikainen P, Kouki J. 2011 Colonisation of ephemeral forest habitats by specialised  
590 species: beetles and bugs associated with recently dead aspen wood. *Biodiversity and*  
591 *Conservation* **20**, 2903–2915. (doi:10.1007/s10531-011-0124-y)
- 592 13. Alstad AO, Damschen EI. 2016 Fire may mediate effects of landscape connectivity on plant  
593 community richness in prairie remnants. *Ecography* **39**, 36–42. (doi:10.1111/ecog.01492)
- 594 14. Prugh LR, Hodges KE, Sinclair ARE, Brashares JS. 2008 Effect of habitat area and isolation on  
595 fragmented animal populations. *Proc Natl Acad Sci USA* **105**, 20770.  
596 (doi:10.1073/pnas.0806080105)
- 597 15. Thornton DH, Branch LC, Sunquist ME. 2011 The influence of landscape, patch, and within-patch  
598 factors on species presence and abundance: a review of focal patch studies. *Landscape Ecology*  
599 **26**, 7–18. (doi:10.1007/s10980-010-9549-z)
- 600 16. Cook WM, Lane KT, Foster BL, Holt RD. 2002 Island theory, matrix effects and species richness  
601 patterns in habitat fragments. *Ecology Letters* **5**, 619–623. (doi:10.1046/j.1461-  
602 0248.2002.00366.x)
- 603 17. Moilanen A, Nieminen M. 2002 Simple connectivity measures in spatial ecology. *Ecology* **83**,  
604 1131–1145. (doi:10.1890/0012-9658(2002)083[1131:SCMISE]2.0.CO;2)
- 605 18. Vieira MV, Almeida-Gomes M, Delciellos AC, Cerqueira R, Crouzeilles R. 2018 Fair tests of the  
606 habitat amount hypothesis require appropriate metrics of patch isolation: An example with small  
607 mammals in the Brazilian Atlantic Forest. *Biological Conservation* **226**, 264–270.  
608 (doi:10.1016/j.biocon.2018.08.008)
- 609 19. Jackson HB, Fahrig L. 2012 What size is a biologically relevant landscape? *Landscape Ecology* **27**,  
610 929–941. (doi:10.1007/s10980-012-9757-9)
- 611 20. Economo EP, Keitt TH. 2010 Network isolation and local diversity in neutral metacommunities.  
612 *Oikos* **119**, 1355–1363.

- 613 21. Urban D, Keitt T. 2001 Landscape connectivity: a graph-theoretic perspective. *Ecology* **82**, 1205–  
614 1218. (doi:10.1890/0012-9658(2001)082[1205:LCAGTP]2.0.CO;2)
- 615 22. Wiens JA, Stenseth NC, Van Horne B, Ims RA. 1993 Ecological Mechanisms and Landscape  
616 Ecology. *Oikos* **66**, 369–380. (doi:10.2307/3544931)
- 617 23. Zurell D *et al.* 2010 The virtual ecologist approach: simulating data and observers. *Oikos* **119**,  
618 622–635. (doi:10.1111/j.1600-0706.2009.18284.x)
- 619 24. Hubbell SP. 2001 *The unified neutral theory of biodiversity and biogeography*. Princeton, NJ:  
620 Princeton University Press.
- 621 25. Etherington TR, Holland EP, O’Sullivan D. 2015 NLMpy: a python software package for the  
622 creation of neutral landscape models within a general numerical framework. *Methods in Ecology*  
623 *and Evolution* **6**, 164–168. (doi:10.1111/2041-210X.12308)
- 624 26. Bunn AG, Urban DL, Keitt TH. 2000 Landscape connectivity: A conservation application of graph  
625 theory. *Journal of Environmental Management* **59**, 265–278. (doi:10.1006/jema.2000.0373)
- 626 27. Saura S, Torné J. 2009 Conefor Sensinode 2.2: A software package for quantifying the importance  
627 of habitat patches for landscape connectivity. *Environmental Modelling & Software* **24**, 135–139.  
628 (doi:10.1016/j.envsoft.2008.05.005)
- 629 28. Saura S, Rubio L. 2010 A common currency for the different ways in which patches and links can  
630 contribute to habitat availability and connectivity in the landscape. *Ecography* **33**, 523–537.  
631 (doi:10.1111/j.1600-0587.2009.05760.x)
- 632 29. Mazerolle MJ, Villard M-A. 1999 Patch characteristics and landscape context as predictors of  
633 species presence and abundance: A review1. *Écoscience* **6**, 117–124.  
634 (doi:10.1080/11956860.1999.11952204)
- 635 30. Saura S, Pascual-Hortal L. 2007 A new habitat availability index to integrate connectivity in  
636 landscape conservation planning: Comparison with existing indices and application to a case  
637 study. *Landscape and Urban Planning* **83**, 91–103. (doi:10.1016/j.landurbplan.2007.03.005)
- 638 31. Ranius T. 2006 Measuring the dispersal of saproxylic insects: a key characteristic for their  
639 conservation. *Population Ecology* **48**, 177–188.
- 640 32. Ranius T, Johansson V, Fahrig L. 2011 Predicting spatial occurrence of beetles and  
641 pseudoscorpions in hollow oaks in southeastern Sweden. *Biodiversity and Conservation* **20**,  
642 2027–2040. (doi:10.1007/s10531-011-0072-6)
- 643 33. Bergman K-O, Jansson N, Claesson K, Palmer MW, Milberg P. 2012 How much and at what scale?  
644 Multiscale analyses as decision support for conservation of saproxylic oak beetles. *Forest Ecology*  
645 *and Management* **265**, 133–141. (doi:10.1016/j.foreco.2011.10.030)
- 646 34. Muller-Landau HC, Wright SJ, Calderón O, Condit R, Hubbell SP. 2008 Interspecific variation in  
647 primary seed dispersal in a tropical forest. *Journal of Ecology* **96**, 653–667. (doi:10.1111/j.1365-  
648 2745.2008.01399.x)
- 649 35. Cadotte MW, Mai DV, Jantz S, Collins MD, Keele M, Drake JA. 2006 On Testing the Competition-  
650 Colonization Trade-Off in a Multispecies Assemblage. *The American Naturalist* **168**, 704–709.  
651 (doi:10.1086/508296)

- 652 36. Calcagno V, Mouquet N, Jarne P, David P. 2006 Coexistence in a metacommunity: the  
653 competition–colonization trade-off is not dead. *Ecology Letters* **9**, 897–907.
- 654 37. Laroche F, Jarne P, Perrot T, Massol F. 2016 The evolution of the competition–dispersal trade-off  
655 affects  $\alpha$ - and  $\beta$ -diversity in a heterogeneous metacommunity. *Proceedings of the Royal Society*  
656 *of London B: Biological Sciences* **283**. (doi:10.1098/rspb.2016.0548)
- 657 38. Hanski I. 1994 A practical model of metapopulation dynamics. *Journal of Animal Ecology* **63**,  
658 151–162. (doi:10.2307/5591)
- 659 39. Miguet P, Fahrig L, Lavigne C. 2017 How to quantify a distance-dependent landscape effect on a  
660 biological response. *Methods in Ecology and Evolution* **8**, 1717–1724. (doi:10.1111/2041-  
661 210X.12830)
- 662 40. Simpkins CE, Dennis TE, Etherington TR, Perry GLW. 2018 Assessing the performance of common  
663 landscape connectivity metrics using a virtual ecologist approach. *Ecological Modelling* **367**, 13–  
664 23. (doi:10.1016/j.ecolmodel.2017.11.001)
- 665 41. Emel SL, Storfer A. 2015 Landscape genetics and genetic structure of the southern torrent  
666 salamander, *Rhyacotriton variegatus*. *Conservation Genetics* **16**, 209–221. (doi:10.1007/s10592-  
667 014-0653-5)
- 668 42. Vuilleumier S, Fontanillas P. 2007 Landscape structure affects dispersal in the greater white-  
669 toothed shrew: Inference between genetic and simulated ecological distances. *Ecological*  
670 *Modelling* **201**, 369–376. (doi:10.1016/j.ecolmodel.2006.10.002)
- 671 43. Villard M-A, Metzger JP. 2014 REVIEW: Beyond the fragmentation debate: a conceptual model to  
672 predict when habitat configuration really matters. *Journal of Applied Ecology* **51**, 309–318.  
673 (doi:10.1111/1365-2664.12190)

674

675 **Supplementary figures**

676 **Figure S1: Simulated landscapes with contrasted aggregation and habitat proportion**  
677 **obtained from the midpoint displacement algorithm.** Habitat is pictured in green, matrix in  
678 brown. Columns correspond to distinct levels of habitat proportion: panels A and C correspond  
679 to low habitat proportion (10%), panels B and D correspond to high habitat proportion (40%).  
680 Lines correspond to distinct habitat aggregation: panels A and B correspond to low habitat  
681 aggregation (Hurst exponent = 0.1), panels C and D correspond to high habitat aggregation  
682 (Hurst exponent = 0.9).

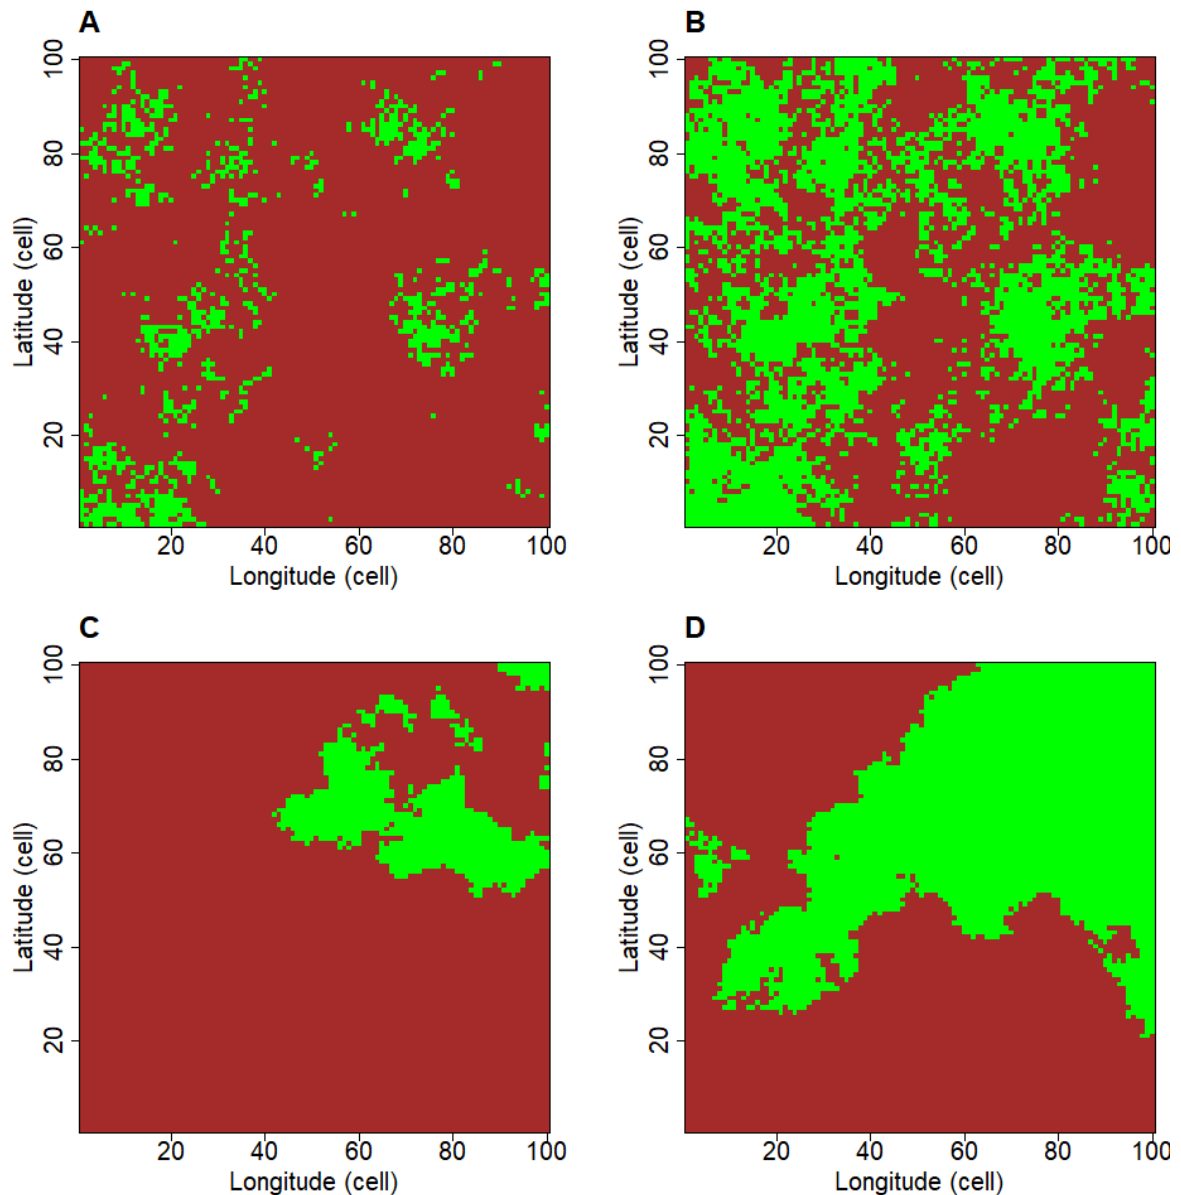

683

684

685 **Figure S2: Average size and number of sets of contiguous cells within simulated**  
686 **landscapes.** Colors correspond to distinct combinations of Hurst exponent (“Hu” in the labels)  
687 and habitat proportion (“p” in the labels). Ellipses correspond to 95%-CI of a fitted bivariate  
688 Student distribution.

689

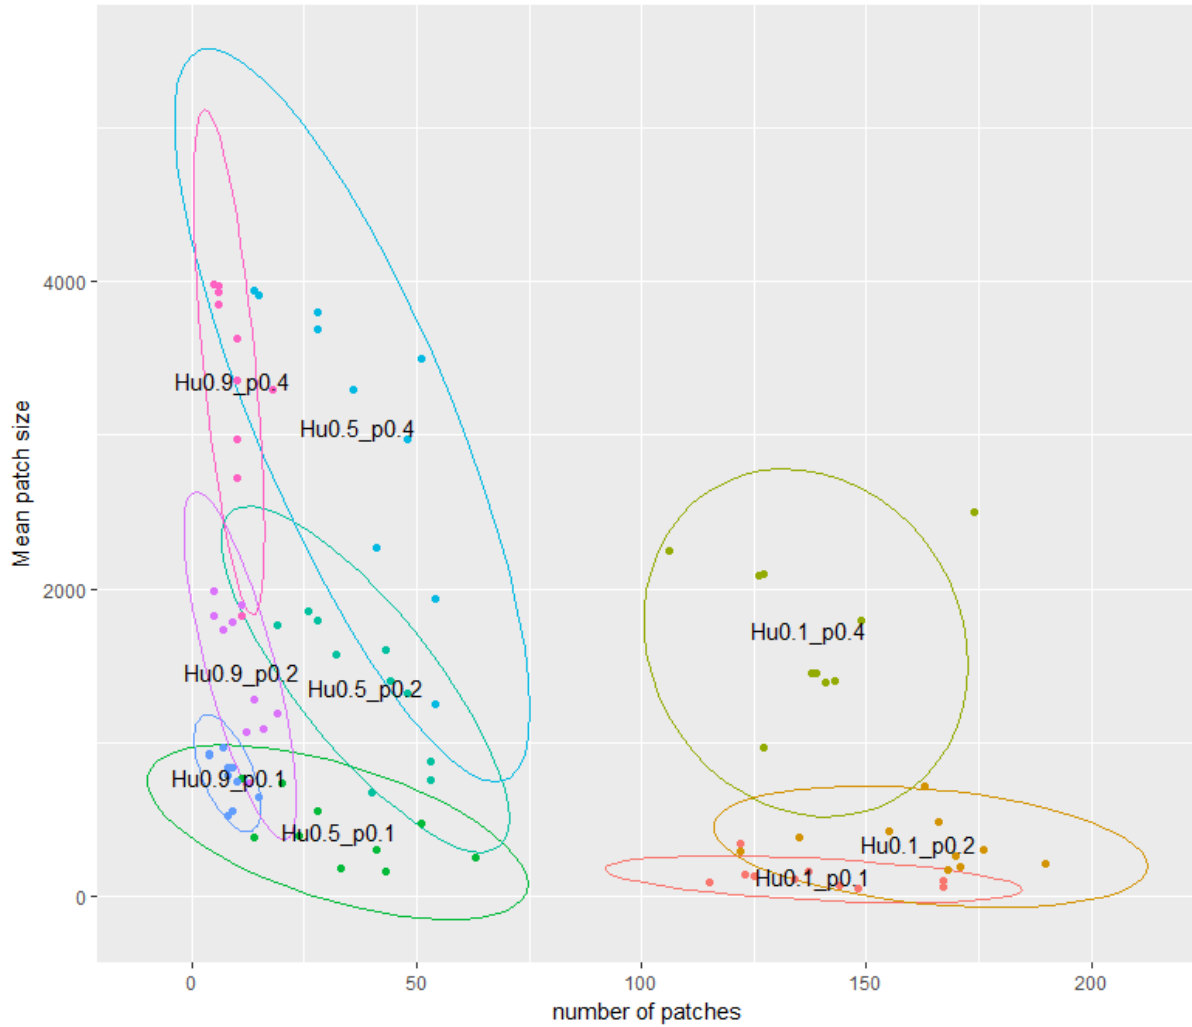

690

691

692 **Figure S3: Lumping of contiguous cells generating the coarse patch delineation**  
693 **perspective.** Panel A shows a habitat map where fine delineation of patches has been applied.  
694 Panel B shows the same habitat map where coarse patch delineation has been applied, i.e.  
695 sets of contiguous cells has been lumped together. Contiguity is based on the Von Neuman  
696 neighborhood of cells.

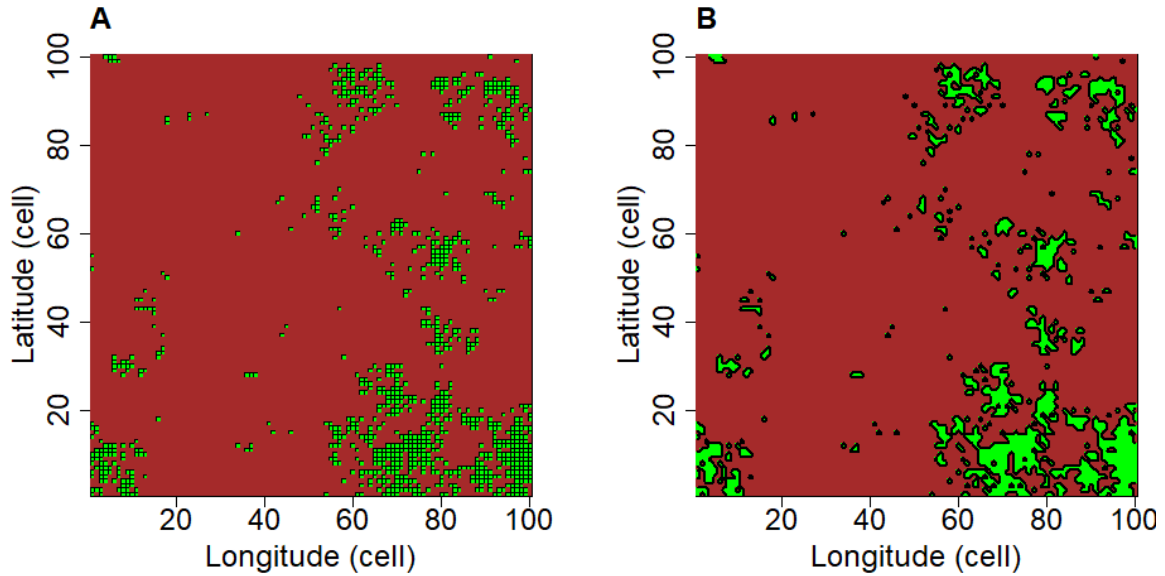

697



698 **Figure S4: Dendrogram of Pearson correlation coefficients among patch structural**  
 699 **connectivity indices across all landscapes.** We presented correlations among *Buffer*, *dF*  
 700 and *dIIcflux* using ascending hierarchical classification. Within each of the 90 simulated  
 701 landscapes, we computed the values of the 13 indices (accounting for distinct scaling values)  
 702 in all habitat cells, which yielded 13 vectors of length 1000 to 4000 depending on the habitat  
 703 proportion. We scaled each of the 13 vectors to mean 0 and variance 1, divided them by the  
 704 square root of the number of habitat cells in the landscapes and computed pairwise Euclidean  
 705 distances among them. We thus obtained one 13×13 distance matrix among patch connectivity  
 706 indices in each of the 90 landscapes. Note that the distance between two indices corresponds  
 707 to  $\sqrt{2 - 2r}$ , where  $r$  is the Pearson correlation between the indices across all habitat cells of  
 708 the considered landscapes. We then averaged the 90 distance matrices to obtain one single  
 709 13×13 distance matrix as a basis for classification. We ran an ascending non-supervised  
 710 classification (*hclust* function of R *base* package), using the *complete* method for group  
 711 merging. A monophyletic group G with common ancestor located at value  $r$  means that any  
 712 pair of indices within G has a correlation above  $r$ . Indices labels in the dendrogram are made  
 713 of three parts separated by underscores “\_”. The first part of the name indicates the type of the  
 714 index (“buf”, “dF”, “dIIcflux”). The second part of the name indicates the scale parameter of  
 715 the index (“d025”, “d050”, “d100”, “d200” corresponding to  $\lambda_c = 0.25, 0.5, 1, 2$  cells respectively,  
 716 and “1”, “2”, “4”, “6”, “8” corresponding to *Buffer* radius  $r_{buf}$  in cells). The last part in meaningless  
 717 here.

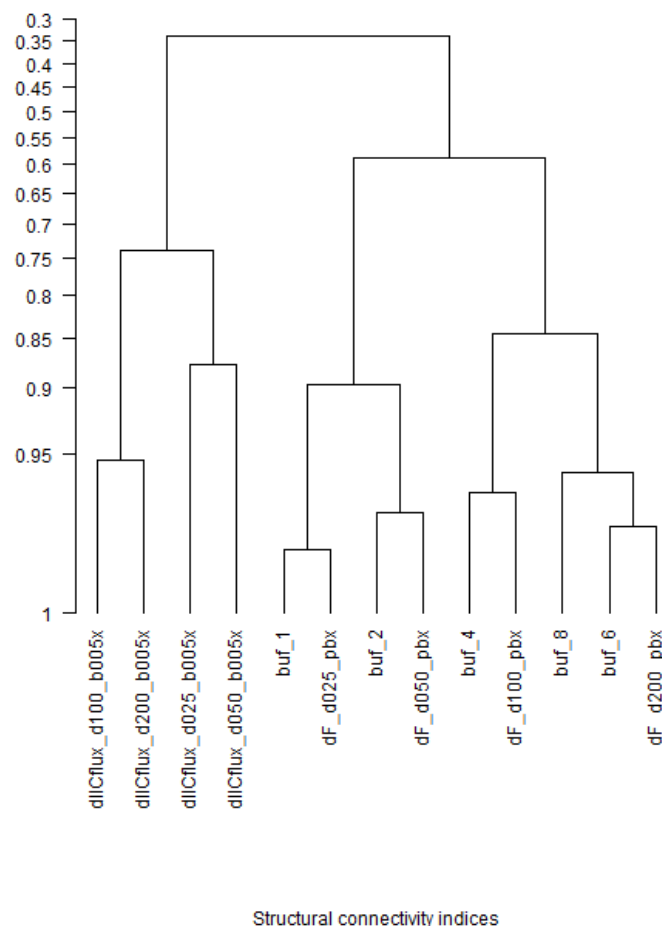

718
